# Supplementary material for: Insight into the acidic group-induced nitration mechanism of 2-methyl-4,6-dihydroxypyrimidine (MDP) with nitronium
Source: Royal Society of Chemistry journal article supplement (doi:10.1039/c6ra18842g), 2016-01-01
Supplement: c6ra18842g1.pdf [file c6ra18842g1.pdf]

## Electronic Supplementary Material Available:

### Insight into the Acidic Group-induced Nitration Mechanism of 2-Methyl-4,6-dihydroxypyrimidine (MDP) with Nitronium

Kuan Wang<sup>a</sup>, Jian-Gang Chen<sup>\*,a</sup>, Bozhou Wang<sup>b</sup>, Yueping Ji<sup>b</sup>, Fengyi Liu<sup>a</sup>, Zhao-Tie Liu<sup>\*,a</sup>,

Wenliang Wang<sup>a</sup>, Zhong-Wen Liu<sup>a</sup>, Zhengping Hao<sup>c</sup>, Jian Lu<sup>\*,b</sup>

<sup>a</sup>Key Laboratory of Applied Surface and Colloid Chemistry (MOE) and School of Chemistry & Chemical Engineering, Shaanxi Normal University, Xi'an, 710119, China

<sup>b</sup>Department of Catalytic Technology, Institute of Xi'an Modern Chemistry, Xi'an, 710065, China

<sup>c</sup>Research Centre for Eco-Environmental Science, Chinese Academy of Sciences, Beijing, 100085, China

The calculated Mulliken atomic charges (e) of MDP and the relevant intermediate *via* B3LYP/6-311G(d,p). Schematic energy diagram of the direct nitration of MDP with NO<sub>2</sub><sup>+</sup> obtained *via* B3LYP-D3/6-311++G(3df,3pd)//B3LYP/6-311G(d,p). Schematic energy diagram of the HSO<sub>4</sub><sup>-</sup>-induced nitration of MDP with NO<sub>2</sub><sup>+</sup> obtained *via* B3LYP-D3/6-311++G(3df,3pd)// B3LYP/6-311G(d,p). Schematic energy diagram of the direct H-transfer of mono-nitro substitution product obtained *via* B3LYP-D3/6-311++G(3df,3pd)//B3LYP/6-311G(d,p). Schematic energy diagram of the direct H-transfer of di-nitro substitution product obtained *via* B3LYP-D3/6-311++G(3df,3pd)//B3LYP/6-311G(d,p). Schematic energy diagram of the *trans*-HSO<sub>4</sub><sup>-</sup>-induced nitration in the second nitration step in path C obtained *via* B3LYP-D3/6-311++G(3df,3pd)//B3LYP/6-311G(d,p). The Hirshfeld atomic charge of the atoms and the Coulomb attraction between the atoms of the pre-intermediates in the step ③ in paths A-C. The  $f$  and  $\Delta f$  of the atoms of the pre-intermediates in the step ③ in paths A to C (calculated from the Hirshfeld charge). Optimized geometries of species for the rate-limiting step in paths A-C calculated *via* B3LYP/6-311G(d,p) (bond lengths are in angstrom). Free energies (G, Hartree) and active free energies ( $\Delta G^\ddagger$ , kcal mol<sup>-1</sup>) for the nitration of MDP with NO<sub>2</sub><sup>+</sup> in the gas (g), formamide (f) and dimethylsulfoxide (d) phases. See DOI: 10.1039/x0xx00000x.

**Table S1** The calculated Mulliken atomic charges (e) of MDP and the relevant intermediate *via* DFT-B3LYP/6-311G(d,p).

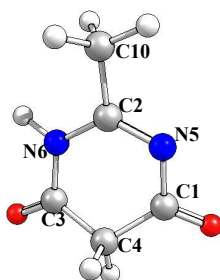

| Species              | C1    | C2    | C3    | C4     | N5     | N6     | C10    |
|----------------------|-------|-------|-------|--------|--------|--------|--------|
| MDP                  | 0.277 | 0.290 | 0.367 | -0.342 | -0.326 | -0.421 | -0.286 |
| A1 <sup>-</sup> -IM1 | 0.343 | 0.360 | 0.390 | -0.319 | -0.453 | -0.412 | -0.263 |
| A1-IM1               | 0.302 | 0.320 | 0.366 | -0.336 | -0.390 | -0.422 | -0.292 |
| A-IM3                | 0.355 | 0.428 | 0.357 | -0.333 | -0.473 | -0.464 | -0.322 |

The Mulliken atomic charges of MDP were calculated *via* the B3LYP/6-311G(d,p) method. The results are shown in Table S1. As is listed in Table S1, the negative charge centers, which may be potentially attacked by  $\text{NO}_2^+$  in MDP, should be C4 (C in methylene group), C10 (C in methyl group), N5 and N6. It is clearly shown in our recent work that the C-nitration is much more favorable than N-nitration in the reaction of TO with  $\text{NO}_2^+$  in the presence of acidic group of  $\text{HSO}_4^-/\text{NO}_3^-$  (RSC Adv., 2015, 5, 25183). Such calculation result has also been experimentally verified in view that the preponderant products in the nitration systems (such as  $\text{NO}_2^+$  with TO (Explos., Pyrotech., 2005, 30, 298) and  $\text{NO}_2^+$  with MDP (J. Org. Chem., 2004, 69, 4369; Acta Chim. Sinica, 2004, 62, 295; Org. Process Res. Dev., 2012, 16, 1711)) are found to be exactly relevant to the C-nitration results. Therefore, only the attacking of methylene C4 and methyl C10 in MDP by the nitration reagent of  $\text{NO}_2^+$  are discussed in the present work.

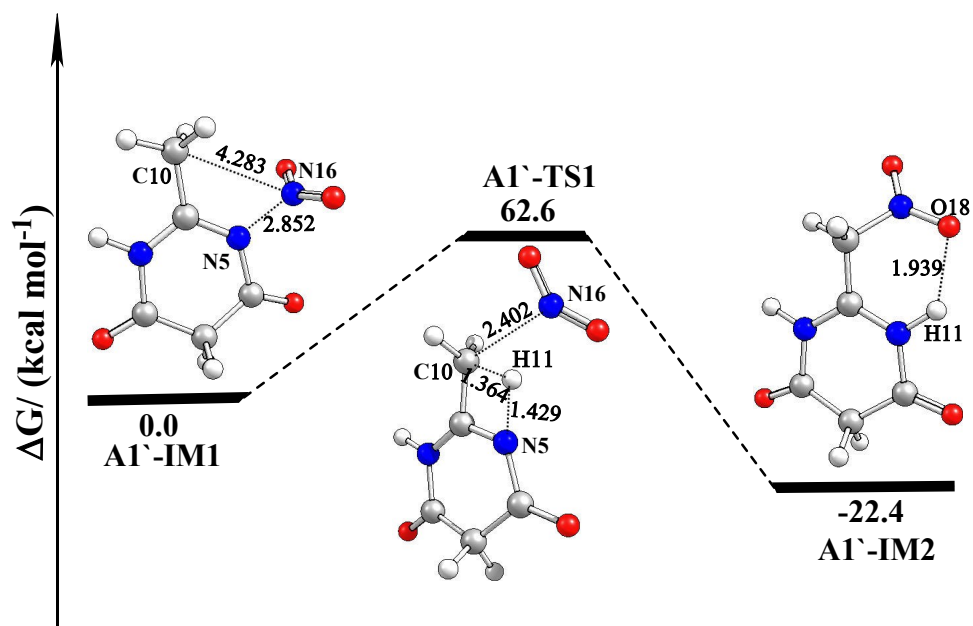

**Fig. S1** Schematic energy diagram of the direct nitration of MDP with  $\text{NO}_2^+$  obtained *via* B3LYP-D3/6-311++G(3df,3pd)//B3LYP/6-311G(d,p).

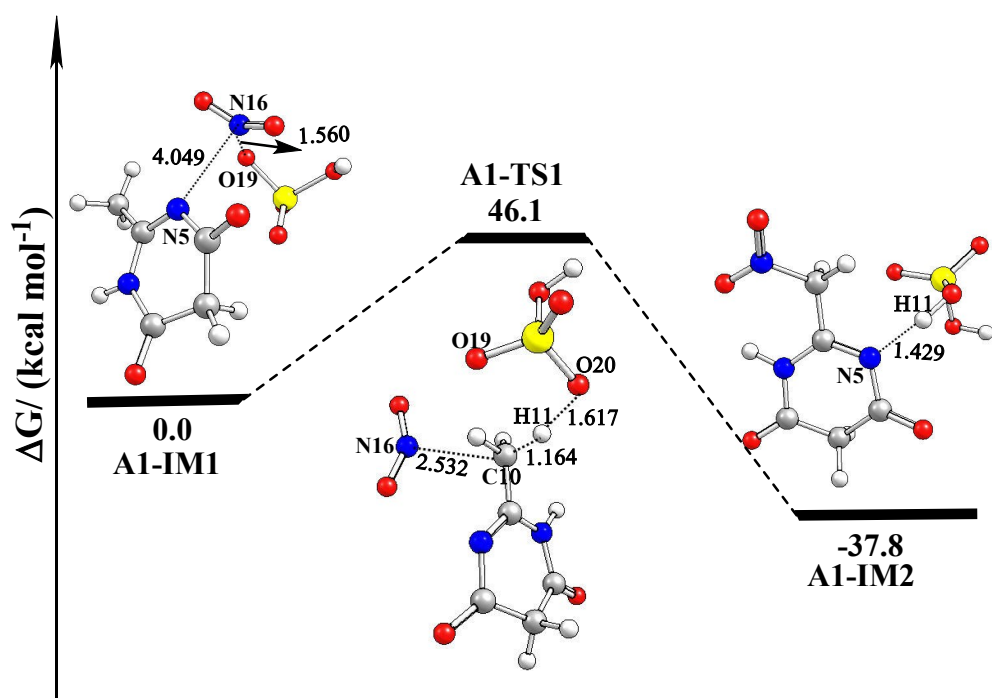

**Fig. S2** Schematic energy diagram of the HSO<sub>4</sub><sup>-</sup>-induced nitration of MDP with NO<sub>2</sub><sup>+</sup> obtained *via* B3LYP-D3/6-311++G(3df,3pd)//B3LYP/6-311G(d,p).

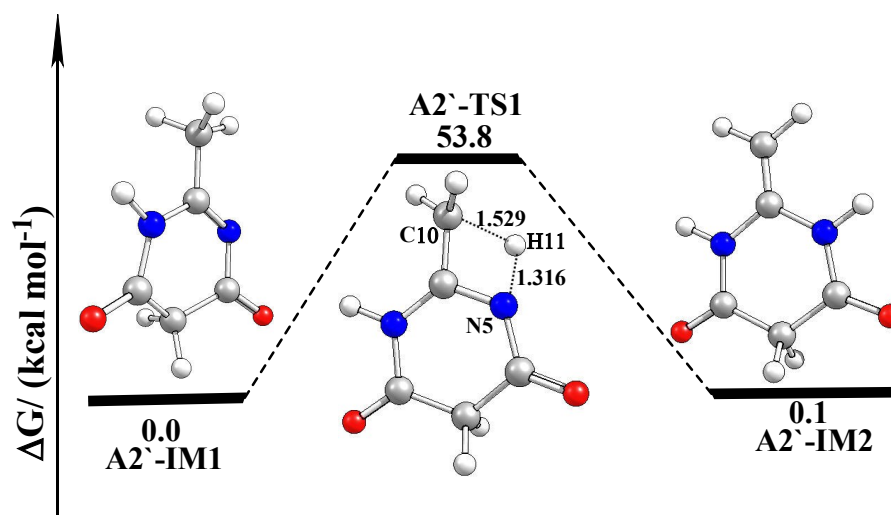

**Fig. S3** Schematic energy diagram of the direct H-transfer of MDP obtained *via* B3LYP-D3/6-311++G(3df,3pd)//B3LYP/6-311G(d,p).

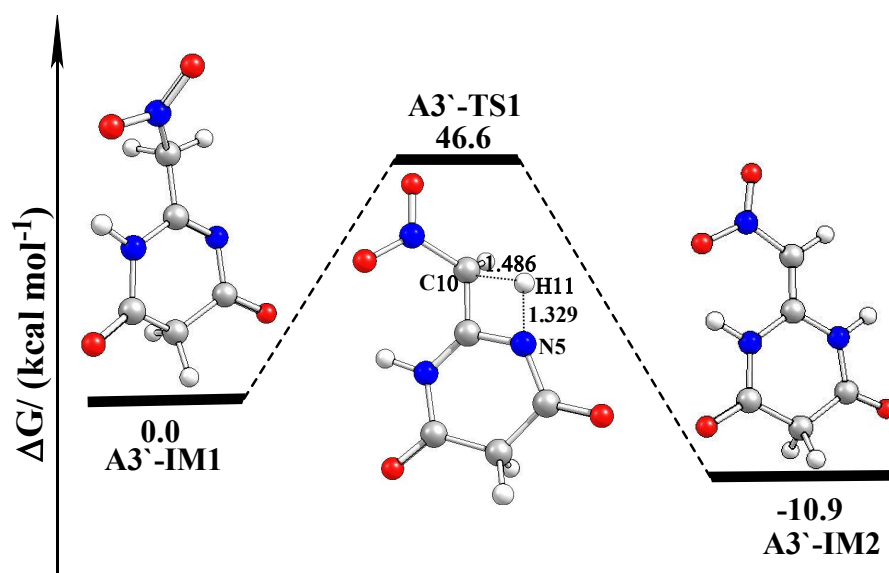

**Fig. S4** Schematic energy diagram of the direct H-transfer of mono-nitro substitution product obtained *via* B3LYP-D3/6-311++G(3df,3pd)//B3LYP/6-311G(d,p).

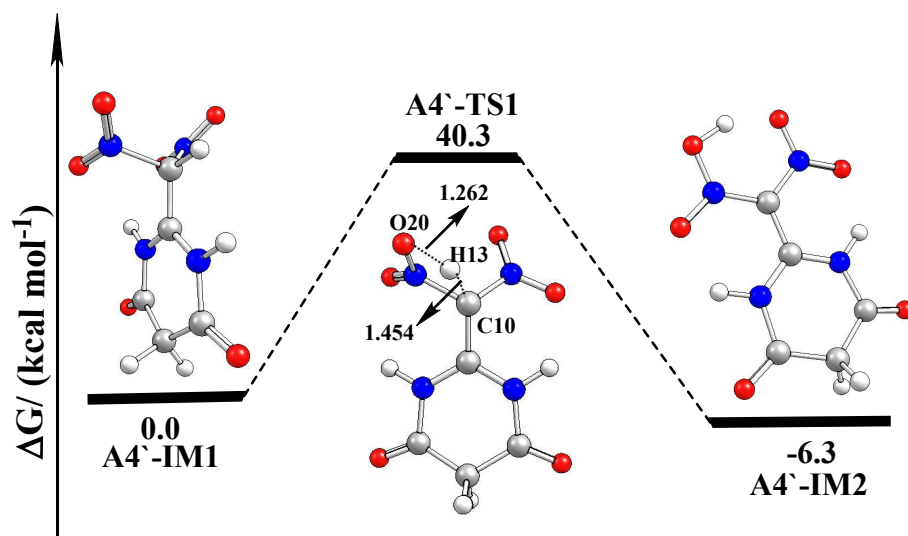

**Fig. S5** Schematic energy diagram of the direct H-transfer of di-nitro substitution product obtained *via* B3LYP-D3/6-311++G(3df,3pd)//B3LYP/6-311G(d,p).

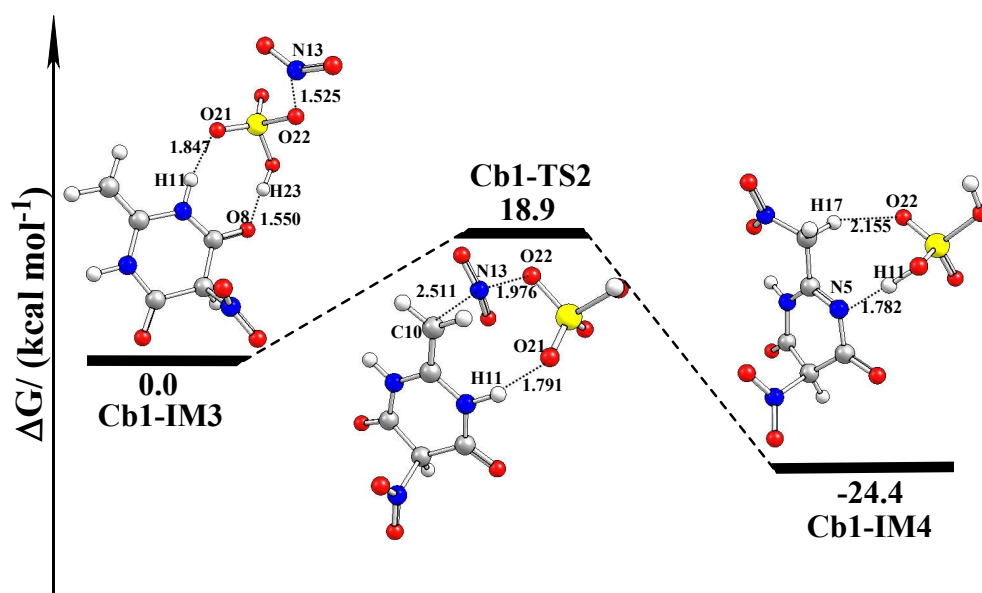

**Fig. S6** Schematic energy diagram of the *trans*-HSO<sub>4</sub><sup>-</sup>-induced nitration in the second nitration step in path C obtained *via* B3LYP-D3/6-311++G(3df,3pd)//B3LYP/6-311G(d,p).

During the second nitration step, a *cis*-transition state, namely Cb-TS2 (Figure 5) and a *trans*-transition state, namely Cb1-TS2 (Figure S6) are obtained, which are associated with two configurations that HSO<sub>4</sub><sup>-</sup>-induced. It is seen that in the NO<sub>2</sub><sup>+</sup> attacking step ① in path C, the *cis*-HSO<sub>4</sub><sup>-</sup>-induced nitration (Figure 1, Cb-IM3→Cb-IM4,  $\Delta G^\ddagger = 7.9$  kcal.mol<sup>-1</sup>) is more favorable than the *trans*-HSO<sub>4</sub><sup>-</sup>-induced one (as shown in Figure S6,  $\Delta G^\ddagger = 18.9$  kcal.mol<sup>-1</sup>). Such calculation is in accordance with the results reported by Zhang et al (Chem. Eur. J., 2014, 20, 1), in which it was reported that *cis*-configuration is more stable than *trans*-configuration for double C60 adducts.



**Table S2** The Hirshfeld atomic charge of the atoms and the Coulomb attraction between the atoms of the pre-intermediates in the step ③ in paths A-C.

| Methods   | Species | Q/e <sup>a</sup> |       |        | r/m <sup>b</sup>        |                         | F/N <sup>c</sup>        |                        |
|-----------|---------|------------------|-------|--------|-------------------------|-------------------------|-------------------------|------------------------|
|           |         | C4               | N16   | O8     | C4-N16                  | O8-N16                  | C4-N16                  | O8-N16                 |
| Hirshfeld | A-IM13  | -0.054           | 0.313 | -0.128 | $3.325 \times 10^{-10}$ | $1.594 \times 10^{-10}$ | $3.531 \times 10^{-11}$ | $3.642 \times 10^{-9}$ |
|           | B-IM15  | -0.066           | 0.309 | -0.107 | $3.477 \times 10^{-10}$ | $1.498 \times 10^{-10}$ | $3.896 \times 10^{-11}$ | $3.403 \times 10^{-9}$ |
|           | Ca-IM5  | -0.057           | 0.311 | -0.107 | $3.475 \times 10^{-11}$ | $1.507 \times 10^{-10}$ | $3.391 \times 10^{-11}$ | $3.384 \times 10^{-9}$ |

a. Q, the atomic charge of the pre-intermediates in the step ③ in paths A to C for the nitration of MDP with NO<sub>2</sub><sup>+</sup> calculated via B3LYP/6-311G(d,p). To calculate the Coulomb force, the charge unit of *e* should be transformed to Coulomb (C) with a relationship as: 1 e=1.602×10<sup>-19</sup> C; b. *r*, the distance between atoms C4 and N16 or atoms O8 and N16 is calculated *via* B3LYP/6-311G(d,p); c. *F*, the Coulomb attraction between atoms C4 and N16 or atoms O8 and N16 is calculated by Coulomb's law ( $F=-kQ_1.Q_2/r^2$ ), where the constant k is 9.0×10<sup>9</sup> Nm<sup>2</sup>/C<sup>2</sup> if other variables take their standard international units.

**Table S3** The  $f$  and  $\Delta f$  of the atoms of the pre-intermediates in the step ③ in paths A to C (calculated from the Hirshfeld charge).<sup>a</sup>

| Species | Atoms | N      | N+1    | N-1    | $f^+(r)$ | $f(r)$ | $\Delta f(r)$ |
|---------|-------|--------|--------|--------|----------|--------|---------------|
| A-IM13  | C4    | -0.054 | -0.15  | 0.101  | 0.096    | 0.165  | -0.069        |
|         | N16   | 0.313  | 0.242  | 0.329  | 0.071    | 0.016  | 0.055         |
|         | O8    | -0.128 | -0.188 | -0.116 | 0.06     | 0.012  | 0.048         |
| B-IM15  | C4    | -0.066 | -0.159 | 0.071  | 0.093    | 0.137  | -0.044        |
|         | N16   | 0.309  | 0.222  | 0.329  | 0.087    | 0.020  | 0.067         |
|         | O8    | -0.107 | -0.154 | -0.077 | 0.047    | 0.030  | 0.017         |
| Ca-IM5  | C4    | -0.057 | -0.124 | 0.072  | 0.067    | 0.129  | -0.062        |
|         | N16   | 0.311  | 0.252  | 0.330  | 0.059    | 0.019  | 0.040         |
|         | O8    | -0.107 | -0.139 | -0.078 | 0.032    | 0.029  | 0.003         |

a. Hirshfeld charge in their N, N+1 and N-1 electrons states for the corresponding atoms in the step ③ in paths A to C is calculated and listed in columns 3 to 5. The condensed  $f$  and  $f^+$  and  $\Delta f$  is calculated and listed in columns 6 to 8.

According to the calculation method (J. Chem. Theory Comput. 2010, 6, 1470; Computers & Chemistry, 2012, 33, 580), the  $f$  referred to the difference of atomic charges in two states.  $f$  and  $\Delta f$  can be expressed and calculated as

$$f^+(r) = q_N - q_{N+1} \quad (1)$$

$$f(r) = q_{N-1} - q_N \quad (2)$$

$$\Delta f(r) = f^+(r) - f(r) \quad (3)$$

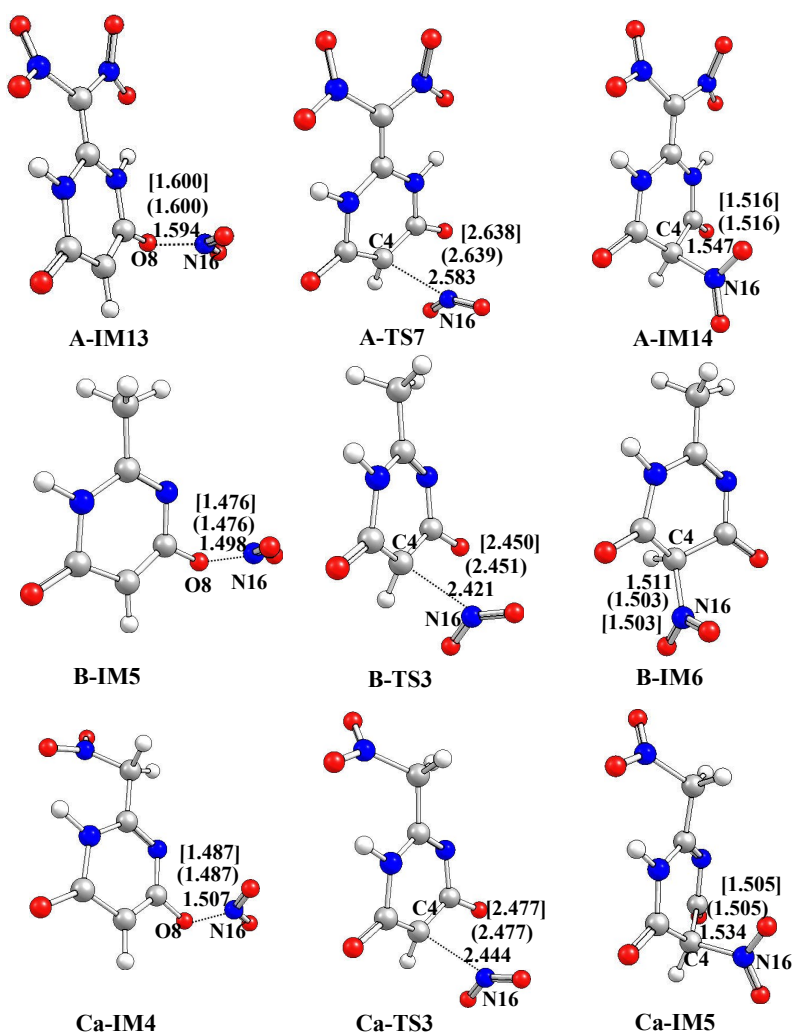

**Fig. S7** Optimized geometries of species for the rate-limiting step in paths A-C calculated *via* B3LYP/6-311G(d,p) (bond lengths are in angstrom). For the bond lengths of species, no-bracket, bracket and square brackets respect gas, formamide and DMSO phases, respectively.

**Table S4** Free energies (G, Hartree) and active free energies ( $\Delta G^\ddagger$ , kcal mol<sup>-1</sup>) for the nitration of MDP with NO<sub>2</sub><sup>+</sup> in the gas (g) and formamide (f) and dimethylsulfoxide (d) phases.<sup>a</sup>

| System        | G(g)         | $\Delta G^\ddagger$ (g) | G(f)         | $\Delta G^\ddagger$ (f) | G(d)         | $\Delta G^\ddagger$ (d) |
|---------------|--------------|-------------------------|--------------|-------------------------|--------------|-------------------------|
| A-IM13        | -1067.868880 |                         | -1067.892100 |                         | -1067.892111 |                         |
| A-TS7         | -1067.833941 |                         | -1067.858344 |                         | -1067.858129 |                         |
| A-IM14        | -1067.910558 |                         | -1067.934647 |                         | -1067.934649 |                         |
| A-IM13→A-IM14 |              | 21.9                    |              | 21.2                    |              | 21.3                    |
| B-IM5         | -658.7420287 |                         | -658.7569809 |                         | -658.7567593 |                         |
| A-TS7         | -658.6957357 |                         | -658.7123957 |                         | -658.7121419 |                         |
| B-IM6         | -658.7711167 |                         | -658.7960904 |                         | -658.7956936 |                         |
| B-IM5→B-IM6   |              | 29.1                    |              | 27.9                    |              | 28.0                    |
| Ca-IM5        | -863.3096296 |                         | -863.3276008 |                         | -863.3715784 |                         |
| A-TS7         | -863.2636412 |                         | -863.2834389 |                         | -863.3273402 |                         |
| Ca-IM6        | -863.3395476 |                         | -863.3639724 |                         | -863.2831436 |                         |
| Ca-IM5→Ca-IM6 |              | 28.9                    |              | 27.7                    |              | 27.8                    |

<sup>a</sup> ZPG was obtained *via* DFT at the B3LYP/6-311G(d,p) level. The energy value ( $\Delta G$ ) was obtained *via* DFT at the B3LYP-D3/6-311++G(3df,3pd)//B3LYP/6-311G(d,p) level.
